# Supplementary material for: Spatial Ventilation Inhomogeneity Determined by Electrical Impedance Tomography in Patients With Chronic Obstructive Lung Disease
Source: Frontiers journal article supplement (doi:10.3389/fphys.2021.762791), 2021-12-13
Supplement: Table_1.pdf [file Table_1.pdf]

**Supplemental Table 1** Results of conventional spirometry in the studied patients with COPD grouped according to the documented GOLD disease severity stage

| Stage             | FEV <sub>1</sub> /FVC (Z score) | FEV <sub>1</sub> (Z score) | FVC (Z score) |
|-------------------|---------------------------------|----------------------------|---------------|
| GOLD I (n = 1)    | -0.28                           | -1.42                      | -1.32         |
| GOLD II (n = 13)  | -1.91 ± 1.08                    | -2.59 ± 0.30               | -1.73 ± 0.91  |
| GOLD III (n = 21) | -3.24 ± 0.68                    | -3.47 ± 0.65               | -2.36 ± 0.86  |
| GOLD IV (n = 27)  | -4.02 ± 0.68                    | -4.61 ± 0.60               | -3.87 ± 0.82  |

*Data are presented as single values or mean ± SD.*

*GOLD, Global Initiative for Chronic Obstructive Lung Disease; FEV<sub>1</sub>, forced expiratory volume in 1s; FVC, forced vital capacity.*
